# Supplementary material for: Recombinant BCG Overexpressing phoP-phoR Confers Enhanced Protection against Tuberculosis
Source: PubMed Central journal article supplement (PMC6277425; doi:10.1016/j.ymthe.2018.08.023), 2018-09-01
Supplement: mmc1.pdf [file mmc1.pdf]

YMTHE, Volume 26

## **Supplemental Information**

**Recombinant BCG Overexpressing *phoP-phoR***

**Confers Enhanced Protection against Tuberculosis**

**Sang Kyun Ahn, Vanessa Tran, Andrea Leung, Mark Ng, Ming Li, and Jun Liu**



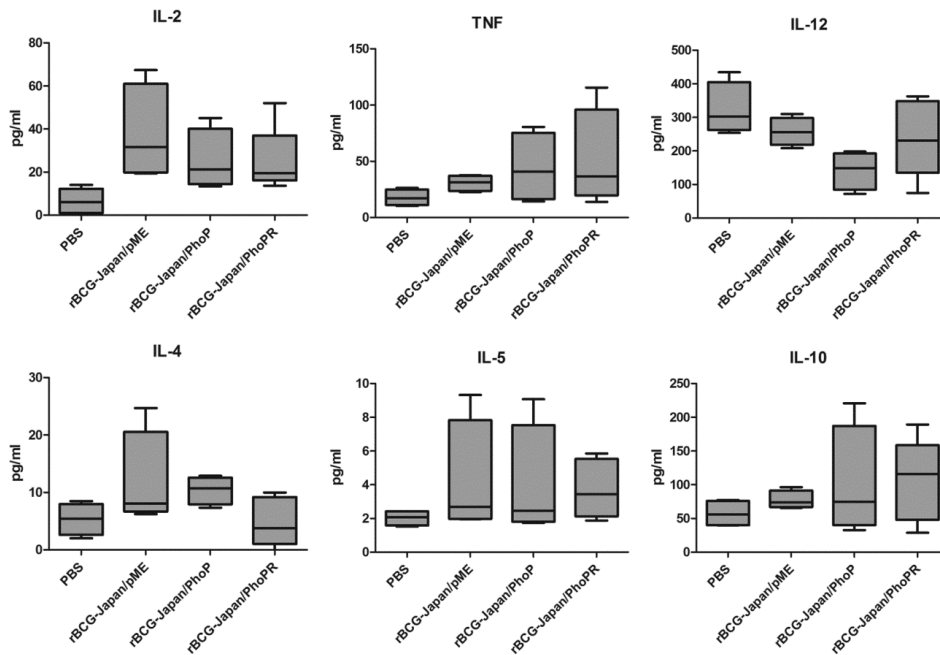

**Figure S2. Immune response induced by recombinant BCG-Japan strains.** C57BL/6 mice ( $n=4$  per group) were immunized subcutaneously with  $5 \times 10^4$  CFU of the indicated BCG strains. At 8 weeks post-vaccination, splenocytes were harvested and were incubated with or without PPD ( $10 \mu\text{g/ml}$ ) for 72 hr and production of the indicated cytokines was analyzed by ELISA. Data are shown as mean  $\pm$  SEM. No statistical difference was found among the four groups in each of the dataset.

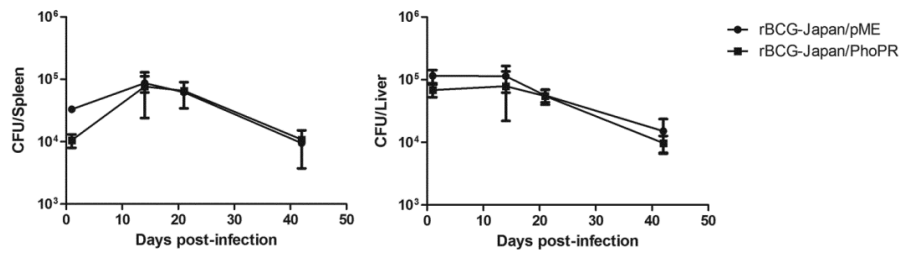

**Figure S3. Replication of the recombinant BCG-Japan strains in immunocompetent mice.** Groups of 4 male C57BL/6 mice were injected intravenously with  $10^8$  CFU of rBCG-Japan/pME or rBCG-Japan/PhoPR. At day 1, 14, 21, and 42 post-infection, mice were euthanized. The harvested organs were homogenized separately and plated on 7H11 agar to assess bacterial burden. Data are shown as mean  $\pm$  S.D.

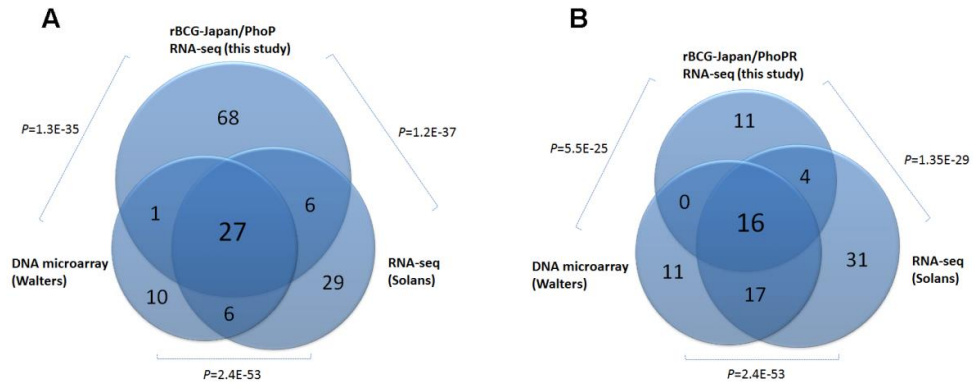

**Figure S4. Overlap of PhoP activated genes identified from three separate studies.**

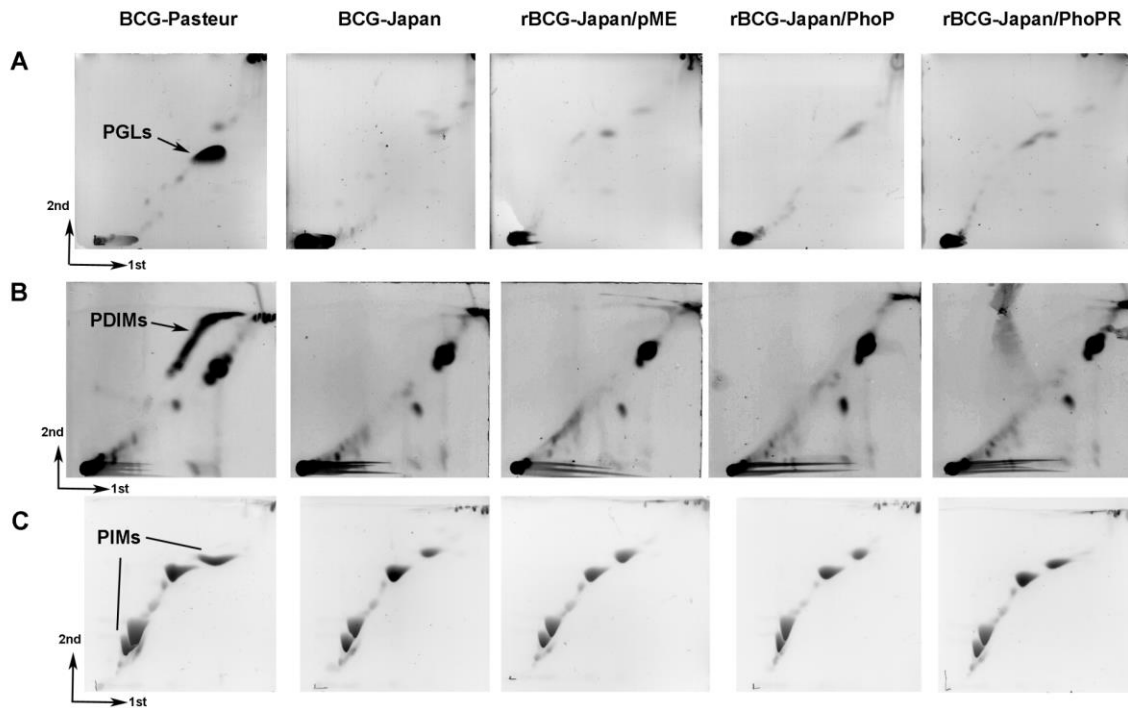

**Figure S5. 2D-TLC analysis of cell wall lipids.** (A) The apolar lipid extract was developed with the solvent system C: chloroform/methanol (96:4) in the first dimension and toluene/acetone (80:20) in the second dimension, followed by charring with  $\alpha$ -naphthol. PGLs: phenolic glycolipids. (B) Apolar lipids were developed with the solvent system A: petroleum ether/ethyl acetate (98:2, v/v, 3 $\times$ ) in the first dimension and petroleum ether/acetone (98:2) in the second dimension, followed by charring with 5% phosphomolybdic acid. PDIMs: phthiocerol dimycocerosates. (C) Polar lipids were separated with the solvent system E: chloroform/methanol/water (60:30:6) in the first dimension and chloroform/acetic acid/methanol/water (40:25:3:6) in the second dimension, followed by charring with  $\alpha$ -naphthol. PIMs: phosphatidylinositol mannosides.
